# Supplementary material for: A literature search tool for intelligent extraction of disease-associated genes
Source: PubMed Central journal article supplement — J Am Med Inform Assoc. 2013 Sep 2;21(3):399–405. doi: 10.1136/amiajnl-2012-001563 (PMC3994846; doi:10.1136/amiajnl-2012-001563), 2013-09-02
Supplement: amiajnl-2012-001563-s1.pdf [file amiajnl-2012-001563-s1.pdf]

## Supplementary Tables

Supp. Table 1 A comparison summary of gene-disorder association references per target disorder.

| Target Disorder          | #Ref. Gene-Disorder Association | #Ref. from other DBs | #Ref. missed in our result | Example ref. in our result only* |
|--------------------------|---------------------------------|----------------------|----------------------------|----------------------------------|
| ADHD                     | 847                             | 463                  | 3                          | [1-5]                            |
| Angelman Syndrome        | 319                             | 11                   | 6                          | [6-10]                           |
| Ankylosing Spondylitis   | 680                             | 210                  | 1                          | [11-15]                          |
| Autism Spectrum Disorder | 1158                            | 279                  | 3                          | [16-20]                          |
| Bipolar Disorder         | 1480                            | 935                  | 182                        | [21-25]                          |
| Down Syndrome            | 1402                            | 119                  | 21                         | [26-30]                          |
| Huntington Disorder      | 1045                            | 108                  | 9                          | [31-35]                          |
| Lynch Syndrome           | 1264                            | 161                  | 1                          | [36-40]                          |
| Multiple Sclerosis       | 2774                            | 878                  | 95                         | [41-45]                          |
| Schizophrenia            | 4419                            | 2691                 | 384                        | [46-50]                          |

\* Up to 5 references are shown, sorted by the score of each document.

Supp. Table 2 References with negative results from our engine and GAD.

| Target Disorder          | #Ref. with negative result | #Ref. with negative result in GAD | #Ref. missed in our result | Example ref. in our result only* |
|--------------------------|----------------------------|-----------------------------------|----------------------------|----------------------------------|
| ADHD                     | 135                        | 15                                | 1                          | [51-55]                          |
| Angelman Syndrome        | 21                         | 0                                 | 0                          | [56-60]                          |
| Ankylosing Spondylitis   | 114                        | 13                                | 0                          | [61-65]                          |
| Autism Spectrum Disorder | 168                        | 31                                | 3                          | [66-70]                          |
| Bipolar Disorder         | 341                        | 75                                | 6                          | [11, 71-74]                      |
| Down Syndrome            | 185                        | 3                                 | 0                          | [75-79]                          |
| Huntington Disorder      | 82                         | 3                                 | 2                          | [80-84]                          |
| Lynch Syndrome           | 203                        | 0                                 | 0                          | [85-89]                          |
| Multiple Sclerosis       | 496                        | 73                                | 6                          | [90-94]                          |
| Schizophrenia            | 1029                       | 104                               | 5                          | [95-99]                          |

\* Up to 5 references are shown, sorted by the score of each document.

Supp. Table 3 Categorization of ASD-specific articles.

| Category        | #Ref. | Example Ref.* | Category         | #Ref. | Example Ref.*     |
|-----------------|-------|---------------|------------------|-------|-------------------|
| Reviews         | 232   | [100-109]     | Common /GWAS     | 272   | [110-119]         |
| Case Reports    | 135   | [120-129]     | Rare / CNV       | 139   | [18, 49, 130-137] |
| Animal Models   | 37    | [138-147]     | Exome Sequencing | 5     | [148-152]         |
| Gene Expression | 52    | [153-162]     | Blood / Serum    | 23    | [163-172]         |

\* Up to 10 references are shown, sorted by the score of each document.

Supp. Table 4 Top 10 candidate genes, ordered by collective article score for each gene.

| Symbol         | Name                                               | Score | #Ref. | Example References*      |
|----------------|----------------------------------------------------|-------|-------|--------------------------|
| <b>CNTNAP2</b> | contactin associated protein-like 2                | 56.23 | 34    | [19, 152, 161, 173-179]  |
| <b>FMR1</b>    | fragile X mental retardation 1                     | 50.10 | 68    | [180-189]                |
| <b>SHANK3</b>  | SH3 and multiple ankyrin repeat domains 3          | 48.89 | 32    | [20, 190-198]            |
| <b>MET</b>     | met proto-oncogene                                 | 47.18 | 19    | [199-208]                |
| <b>SLC6A4</b>  | neurotransmitter transporter, serotonin            | 42.87 | 36    | [209-218]                |
| <b>GABRB3</b>  | gamma-aminobutyric acid A receptor, subunit beta 3 | 40.08 | 30    | [59, 219-227]            |
| <b>MECP2</b>   | methyl CpG binding protein 2                       | 39.64 | 47    | [219, 228-236]           |
| <b>PTEN</b>    | phosphatase and tensin homolog                     | 38.09 | 27    | [182, 237-245]           |
| <b>NRXN1</b>   | neurexin 1                                         | 32.52 | 23    | [124, 136, 175, 246-252] |
| <b>EN2</b>     | engrailed 2                                        | 31.72 | 17    | [253-262]                |

\* Up to 10 references are shown, sorted by the score of each document.

Supp. Table 5. Top 20 genetics-related keywords, sorted by word frequency.

| Word         | Frequency | Word           | Frequency |
|--------------|-----------|----------------|-----------|
| gene         | 1.14e-02  | genotype       | 2.07e-03  |
| expression   | 8.46e-03  | variant        | 1.58e-03  |
| protein      | 4.73e-03  | pathway        | 1.34e-03  |
| mutation     | 4.17e-03  | susceptibility | 1.32e-03  |
| polymorphism | 3.63e-03  | chromosome     | 1.30e-03  |
| genetic      | 3.37e-03  | promoter       | 1.29e-03  |
| receptor     | 3.34e-03  | SNP            | 1.15e-03  |
| allele       | 2.53e-03  | kinase         | 1.12e-03  |
| DNA          | 2.47e-03  | binding        | 1.02e-03  |
| mRNA         | 2.29e-03  | regulation     | 1.01e-03  |
| association  | 2.09e-03  | phenotype      | 9.94e-04  |

Supp. Table 6 Gene Symbol Recognition Comparison.

| Tools                 | Precision | Recall | F-Score |
|-----------------------|-----------|--------|---------|
| GeneHawk              | 0.988     | 0.843  | 0.909   |
| ABNER (NLPBA)         | 0.159     | 0.763  | 0.262   |
| BANNER (BioCreative2) | 0.303     | 0.875  | 0.451   |

## PubMed Article Search Results

1. Sakrikar D, Mazei-Robison MS, Mergy MA, et al. Attention deficit/hyperactivity disorder-derived coding variation in the dopamine transporter disrupts microdomain targeting and trafficking regulation. *J Neurosci* 2012;**32**(16):5385-97. PubMed PMID: 22514303. Pubmed Central PMCID: 3342037.
2. Lange M, Norton W, Coolen M, et al. The ADHD-susceptibility gene Iphn3.1 modulates dopaminergic neuron formation and locomotor activity during zebrafish development. *Mol Psychiatry* 2012;**17**(9):946-54. PubMed PMID: 22508465.
3. Williams NM, Franke B, Mick E, et al. Genome-wide analysis of copy number variants in attention deficit hyperactivity disorder: the role of rare variants and duplications at 15q13.3. *Am J Psychiatry* 2012;**169**(2):195-204. PubMed PMID: 22420048.
4. Baird AL, Coogan AN, Siddiqui A, et al. Adult attention-deficit hyperactivity disorder is associated with alterations in circadian rhythms at the behavioural, endocrine and molecular levels. *Mol Psychiatry* 2012;**17**(10):988-95. PubMed PMID: 22105622.
5. Gong R, Ding C, Hu J, et al. Role for the membrane receptor guanylyl cyclase-C in attention deficiency and hyperactive behavior. *Science* 2011;**333**(6049):1642-6. PubMed PMID: 21835979.
6. Chamberlain SJ, Chen PF, Ng KY, et al. Induced pluripotent stem cell models of the genomic imprinting disorders Angelman and Prader-Willi syndromes. *Proc Natl Acad Sci U S A* 2010;**107**(41):17668-73. PubMed PMID: 20876107. Pubmed Central PMCID: 2955112.
7. Godavarthi SK, Dey P, Maheshwari M, et al. Defective glucocorticoid hormone receptor signaling leads to increased stress and anxiety in a mouse model of Angelman syndrome. *Hum Mol Genet* 2012;**21**(8):1824-34. PubMed PMID: 22215440.
8. Huang HS, Allen JA, Mabb AM, et al. Topoisomerase inhibitors unsilence the dormant allele of Ube3a in neurons. *Nature* 2012;**481**(7380):185-9. PubMed PMID: 22190039. Pubmed Central PMCID: 3257422.
9. Kaphzan H, Buffington SA, Jung JI, et al. Alterations in intrinsic membrane properties and the axon initial segment in a mouse model of Angelman syndrome. *J Neurosci* 2011;**31**(48):17637-48. PubMed PMID: 22131424. Pubmed Central PMCID: 3483031.
10. Rabinovitz S, Kaufman Y, Ludwig G, et al. Mechanisms of activation of the paternally expressed genes by the Prader-Willi imprinting center in the Prader-Willi/Angelman syndromes domains. *Proc Natl Acad Sci U S A* 2012;**109**(19):7403-8. PubMed PMID: 22529396. Pubmed Central PMCID: 3358894.
11. Doyle GA, Lai AT, Chou AD, et al. Re-sequencing of ankyrin 3 exon 48 and case-control association analysis of rare variants in bipolar disorder type I. *Bipolar Disord* 2012;**14**(8):809-21. PubMed PMID: 22966748.
12. Jadon D, Tillett W, Wallis D, et al. Exploring ankylosing spondylitis-associated ERAP1, IL23R and IL12B gene polymorphisms in subphenotypes of psoriatic arthritis. *Rheumatology (Oxford)* 2012. PubMed PMID: 23093722.
13. Haroon N, Tsui FW, Uchanska-Ziegler B, et al. Endoplasmic reticulum aminopeptidase 1 (ERAP1) exhibits functionally significant interaction with HLA-B27 and relates to subtype specificity in ankylosing spondylitis. *Ann Rheum Dis* 2012;**71**(4):589-95. PubMed PMID: 22355039.
14. Ciccia F, Rizzo A, Accardo-Palumbo A, et al. Increased expression of interleukin-32 in the inflamed ileum of ankylosing spondylitis patients. *Rheumatology (Oxford)* 2012;**51**(11):1966-72. PubMed PMID: 22847681.

15. Danoy P, Pryce K, Hadler J, et al. Association of variants at 1q32 and STAT3 with ankylosing spondylitis suggests genetic overlap with Crohn's disease. *PLoS Genet* 2010;**6**(12):e1001195. PubMed PMID: 21152001. Pubmed Central PMCID: 2996314.
16. Novarino G, El-Fishawy P, Kayserili H, et al. Mutations in BCKD-kinase lead to a potentially treatable form of autism with epilepsy. *Science* 2012;**338**(6105):394-7. PubMed PMID: 22956686.
17. de Anda FC, Rosario AL, Durak O, et al. Autism spectrum disorder susceptibility gene TAO2 affects basal dendrite formation in the neocortex. *Nat Neurosci* 2012;**15**(7):1022-31. PubMed PMID: 22683681.
18. O'Roak BJ, Vives L, Girirajan S, et al. Sporadic autism exomes reveal a highly interconnected protein network of de novo mutations. *Nature* 2012;**485**(7397):246-50. PubMed PMID: 22495309. Pubmed Central PMCID: 3350576.
19. Penagarikano O, Abrahams BS, Herman EI, et al. Absence of CNTNAP2 leads to epilepsy, neuronal migration abnormalities, and core autism-related deficits. *Cell* 2011;**147**(1):235-46. PubMed PMID: 21962519. Pubmed Central PMCID: 3390029.
20. Peca J, Feliciano C, Ting JT, et al. Shank3 mutant mice display autistic-like behaviours and striatal dysfunction. *Nature* 2011;**472**(7344):437-42. PubMed PMID: 21423165. Pubmed Central PMCID: 3090611.
21. Rueckert EH, Barker D, Ruderfer D, et al. Cis-acting regulation of brain-specific ANK3 gene expression by a genetic variant associated with bipolar disorder. *Mol Psychiatry* 2012. PubMed PMID: 22850628.
22. Sheng G, Demers M, Subburaju S, et al. Differences in the circuitry-based association of copy numbers and gene expression between the hippocampi of patients with schizophrenia and the hippocampi of patients with bipolar disorder. *Arch Gen Psychiatry* 2012;**69**(6):550-61. PubMed PMID: 22309971.
23. Kirshenbaum GS, Clapcote SJ, Duffy S, et al. Mania-like behavior induced by genetic dysfunction of the neuron-specific Na<sup>+</sup>,K<sup>+</sup>-ATPase alpha3 sodium pump. *Proc Natl Acad Sci U S A* 2011;**108**(44):18144-9. PubMed PMID: 22025725. Pubmed Central PMCID: 3207708.
24. Rakofsky JJ, Ressler KJ, Dunlop BW. BDNF function as a potential mediator of bipolar disorder and post-traumatic stress disorder comorbidity. *Mol Psychiatry* 2012;**17**(1):22-35. PubMed PMID: 21931317.
25. Jogia J, Ruberto G, Lelli-Chiesa G, et al. The impact of the CACNA1C gene polymorphism on frontolimbic function in bipolar disorder. *Mol Psychiatry* 2011;**16**(11):1070-1. PubMed PMID: 21519340.
26. Roy A, Cowan G, Mead AJ, et al. Perturbation of fetal liver hematopoietic stem and progenitor cell development by trisomy 21. *Proc Natl Acad Sci U S A* 2012;**109**(43):17579-84. PubMed PMID: 23045701. Pubmed Central PMCID: 3491522.
27. Martin KR, Corlett A, Dubach D, et al. Over-expression of RCAN1 causes Down syndrome-like hippocampal deficits that alter learning and memory. *Hum Mol Genet* 2012;**21**(13):3025-41. PubMed PMID: 22511596.
28. Cossec JC, Lavour J, Berman DE, et al. Trisomy for synaptojanin1 in Down syndrome is functionally linked to the enlargement of early endosomes. *Hum Mol Genet* 2012;**21**(14):3156-72. PubMed PMID: 22511594. Pubmed Central PMCID: 3384382.
29. Lu J, Lian G, Zhou H, et al. OLIG2 over-expression impairs proliferation of human Down syndrome neural progenitors. *Hum Mol Genet* 2012;**21**(10):2330-40. PubMed PMID: 22343408. Pubmed Central PMCID: 3335315.
30. Baek KH, Zaslavsky A, Lynch RC, et al. Down's syndrome suppression of tumour growth and the role of the calcineurin inhibitor DSCR1. *Nature* 2009;**459**(7250):1126-30. PubMed PMID: 19458618. Pubmed Central PMCID: 2724004.

31. Yu D, Pendergraff H, Liu J, et al. Single-stranded RNAs use RNAi to potently and allele-selectively inhibit mutant huntingtin expression. *Cell* 2012;**150**(5):895-908. PubMed PMID: 22939619. Pubmed Central PMCID: 3444165.
32. Seixas AI, Holmes SE, Takeshima H, et al. Loss of junctophilin-3 contributes to Huntington disease-like 2 pathogenesis. *Ann Neurol* 2012;**71**(2):245-57. PubMed PMID: 22367996.
33. Jeong H, Cohen DE, Cui L, et al. Sirt1 mediates neuroprotection from mutant huntingtin by activation of the TORC1 and CREB transcriptional pathway. *Nat Med* 2012;**18**(1):159-65. PubMed PMID: 22179316.
34. Wilburn B, Rudnicki DD, Zhao J, et al. An antisense CAG repeat transcript at JPH3 locus mediates expanded polyglutamine protein toxicity in Huntington's disease-like 2 mice. *Neuron* 2011;**70**(3):427-40. PubMed PMID: 21555070. Pubmed Central PMCID: 3107122.
35. Sadagurski M, Cheng Z, Rozzo A, et al. IRS2 increases mitochondrial dysfunction and oxidative stress in a mouse model of Huntington disease. *J Clin Invest* 2011;**121**(10):4070-81. PubMed PMID: 21926467. Pubmed Central PMCID: 3195462.
36. Engel C, Loeffler M, Steinke V, et al. Risks of Less Common Cancers in Proven Mutation Carriers With Lynch Syndrome. *J Clin Oncol* 2012. PubMed PMID: 23091106.
37. Tavakkol Z, Keller JJ, Furmanczyk PS, et al. Germline mutation in MSH6 associated with multiple malignant neoplasms in a patient With Muir-Torre syndrome. *J Clin Oncol* 2012;**30**(22):e195-8. PubMed PMID: 22734033.
38. Kloor M, Huth C, Voigt AY, et al. Prevalence of mismatch repair-deficient crypt foci in Lynch syndrome: a pathological study. *Lancet Oncol* 2012;**13**(6):598-606. PubMed PMID: 22552011.
39. De Grassi A, Segala C, Iannelli F, et al. Ultradeep sequencing of a human ultraconserved region reveals somatic and constitutional genomic instability. *PLoS Biol* 2010;**8**(1):e1000275. PubMed PMID: 20052272. Pubmed Central PMCID: 2794366.
40. Ligtenberg MJ, Kuiper RP, Chan TL, et al. Heritable somatic methylation and inactivation of MSH2 in families with Lynch syndrome due to deletion of the 3' exons of TACSTD1. *Nat Genet* 2009;**41**(1):112-7. PubMed PMID: 19098912.
41. Bai L, Lennon DP, Caplan AI, et al. Hepatocyte growth factor mediates mesenchymal stem cell-induced recovery in multiple sclerosis models. *Nat Neurosci* 2012;**15**(6):862-70. PubMed PMID: 22610068. Pubmed Central PMCID: 3427471.
42. Arima Y, Harada M, Kamimura D, et al. Regional neural activation defines a gateway for autoreactive T cells to cross the blood-brain barrier. *Cell* 2012;**148**(3):447-57. PubMed PMID: 22304915.
43. International Multiple Sclerosis Genetics C, Wellcome Trust Case Control C, Sawcer S, et al. Genetic risk and a primary role for cell-mediated immune mechanisms in multiple sclerosis. *Nature* 2011;**476**(7359):214-9. PubMed PMID: 21833088. Pubmed Central PMCID: 3182531.
44. Muramatsu R, Kubo T, Mori M, et al. RGMa modulates T cell responses and is involved in autoimmune encephalomyelitis. *Nat Med* 2011;**17**(4):488-94. PubMed PMID: 21423182.
45. Lyons DA, Naylor SG, Scholze A, et al. Kif1b is essential for mRNA localization in oligodendrocytes and development of myelinated axons. *Nat Genet* 2009;**41**(7):854-8. PubMed PMID: 19503091. Pubmed Central PMCID: 2702462.
46. Xu B, Ionita-Laza I, Roos JL, et al. De novo gene mutations highlight patterns of genetic and neural complexity in schizophrenia. *Nat Genet* 2012. PubMed PMID: 23042115.
47. Fillman SG, Cloonan N, Catts VS, et al. Increased inflammatory markers identified in the dorsolateral prefrontal cortex of individuals with schizophrenia. *Mol Psychiatry* 2012. PubMed PMID: 22869038.

48. Ayalew M, Le-Niculescu H, Levey DF, et al. Convergent functional genomics of schizophrenia: from comprehensive understanding to genetic risk prediction. *Mol Psychiatry* 2012;**17**(9):887-905. PubMed PMID: 22584867. Pubmed Central PMCID: 3427857.
49. Talkowski ME, Rosenfeld JA, Blumenthal I, et al. Sequencing chromosomal abnormalities reveals neurodevelopmental loci that confer risk across diagnostic boundaries. *Cell* 2012;**149**(3):525-37. PubMed PMID: 22521361. Pubmed Central PMCID: 3340505.
50. Kim JY, Liu CY, Zhang F, et al. Interplay between DISC1 and GABA signaling regulates neurogenesis in mice and risk for schizophrenia. *Cell* 2012;**148**(5):1051-64. PubMed PMID: 22385968. Pubmed Central PMCID: 3294278.
51. Stevenson J, Sonuga-Barke E, McCann D, et al. The role of histamine degradation gene polymorphisms in moderating the effects of food additives on children's ADHD symptoms. *Am J Psychiatry* 2010;**167**(9):1108-15. PubMed PMID: 20551163.
52. Hebebrand J, Dempfle A, Saar K, et al. A genome-wide scan for attention-deficit/hyperactivity disorder in 155 German sib-pairs. *Mol Psychiatry* 2006;**11**(2):196-205. PubMed PMID: 16222334.
53. Salatino-Oliveira A, Genro JP, Chazan R, et al. Association study of GIT1 gene with attention-deficit hyperactivity disorder in Brazilian children and adolescents. *Genes Brain Behav* 2012;**11**(7):864-8. PubMed PMID: 22897819.
54. Lynn DE, Lubke G, Yang M, et al. Temperament and character profiles and the dopamine D4 receptor gene in ADHD. *Am J Psychiatry* 2005;**162**(5):906-13. PubMed PMID: 15863792.
55. Kustanovich V, Ishii J, Crawford L, et al. Transmission disequilibrium testing of dopamine-related candidate gene polymorphisms in ADHD: confirmation of association of ADHD with DRD4 and DRD5. *Mol Psychiatry* 2004;**9**(7):711-7. PubMed PMID: 14699430.
56. Bressler J, Tsai TF, Wu MY, et al. The SNRPN promoter is not required for genomic imprinting of the Prader-Willi/Angelman domain in mice. *Nat Genet* 2001;**28**(3):232-40. PubMed PMID: 11431693.
57. Fichou Y, Bahi-Buisson N, Nectoux J, et al. Mutation in the SLC9A6 gene is not a frequent cause of sporadic Angelman-like syndrome. *Eur J Hum Genet* 2009;**17**(11):1378-80. PubMed PMID: 19471312. Pubmed Central PMCID: 2986687.
58. DuBose AJ, Johnstone KA, Smith EY, et al. Atp10a, a gene adjacent to the PWS/AS gene cluster, is not imprinted in mouse and is insensitive to the PWS-IC. *Neurogenetics* 2010;**11**(2):145-51. PubMed PMID: 19894069.
59. Curran S, Roberts S, Thomas S, et al. An association analysis of microsatellite markers across the Prader-Willi/Angelman critical region on chromosome 15 (q11-13) and autism spectrum disorder. *Am J Med Genet B Neuropsychiatr Genet* 2005;**137B**(1):25-8. PubMed PMID: 15952184.
60. Wevrick R, Kerns JA, Francke U. Identification of a novel paternally expressed gene in the Prader-Willi syndrome region. *Hum Mol Genet* 1994;**3**(10):1877-82. PubMed PMID: 7849716.
61. Davidson SI, Liu Y, Danoy PA, et al. Association of STAT3 and TNFRSF1A with ankylosing spondylitis in Han Chinese. *Ann Rheum Dis* 2011;**70**(2):289-92. PubMed PMID: 21068102.
62. Harvey D, Pointon JJ, Sleator C, et al. Analysis of killer immunoglobulin-like receptor genes in ankylosing spondylitis. *Ann Rheum Dis* 2009;**68**(4):595-8. PubMed PMID: 19019897.
63. Wei JC, Lee HS, Chen WC, et al. Genetic polymorphisms of the matrix metalloproteinase-3 (MMP-3) and tissue inhibitors of matrix metalloproteinases-1 (TIMP-1) modulate the development of ankylosing spondylitis. *Ann Rheum Dis* 2009;**68**(11):1781-6. PubMed PMID: 19019896.
64. Cantaert T, Stone MA, ter Borg M, et al. A functional polymorphism of TIR-domain-containing adaptor protein is not associated with axial spondyloarthritis. *Ann Rheum Dis* 2008;**67**(5):720-2. PubMed PMID: 18073264.
65. Harvey D, Pointon JJ, Karaderi T, et al. A common functional variant of endoplasmic reticulum aminopeptidase 2 (ERAP2) that reduces major histocompatibility complex class I expression is not



- associated with ankylosing spondylitis. *Rheumatology (Oxford)* 2011;**50**(9):1720-1. PubMed PMID: 21719416. Pubmed Central PMCID: 3157631.
66. Palmieri L, Papaleo V, Porcelli V, et al. Altered calcium homeostasis in autism-spectrum disorders: evidence from biochemical and genetic studies of the mitochondrial aspartate/glutamate carrier AGC1. *Mol Psychiatry* 2010;**15**(1):38-52. PubMed PMID: 18607376.
67. Hynes K, Tarpey P, Dibbens LM, et al. Epilepsy and mental retardation limited to females with PCDH19 mutations can present de novo or in single generation families. *J Med Genet* 2010;**47**(3):211-6. PubMed PMID: 19752159.
68. Rabionet R, McCauley JL, Jaworski JM, et al. Lack of association between autism and SLC25A12. *Am J Psychiatry* 2006;**163**(5):929-31. PubMed PMID: 16648338.
69. Song RR, Zou L, Zhong R, et al. An integrated meta-analysis of two variants in HOXA1/HOXB1 and their effect on the risk of autism spectrum disorders. *PLoS One* 2011;**6**(9):e25603. PubMed PMID: 21980499. Pubmed Central PMCID: 3183057.
70. Konyukh M, Delorme R, Chaste P, et al. Variations of the candidate SEZ6L2 gene on Chromosome 16p11.2 in patients with autism spectrum disorders and in human populations. *PLoS One* 2011;**6**(3):e17289. PubMed PMID: 21394203. Pubmed Central PMCID: 3048866.
71. Liu C, Shi J, Badner JA, et al. No association of trace amine receptor genes with bipolar disorder. *Mol Psychiatry* 2007;**12**(11):979-81. PubMed PMID: 17957234.
72. Ding L, Hegde AN. Expression of RGS4 splice variants in dorsolateral prefrontal cortex of schizophrenic and bipolar disorder patients. *Biol Psychiatry* 2009;**65**(6):541-5. PubMed PMID: 19041089.
73. Kishi T, Yoshimura R, Fukuo Y, et al. The CLOCK gene and mood disorders: a case-control study and meta-analysis. *Chronobiol Int* 2011;**28**(9):825-33. PubMed PMID: 22080789.
74. Moon E, Rollins B, Mesen A, et al. Lack of association to a NRG1 missense polymorphism in schizophrenia or bipolar disorder in a Costa Rican population. *Schizophr Res* 2011;**131**(1-3):52-7. PubMed PMID: 21745728. Pubmed Central PMCID: 3159824.
75. Heywood W, Wang D, Madgett TE, et al. The development of a peptide SRM-based tandem mass spectrometry assay for prenatal screening of Down syndrome. *J Proteomics* 2012;**75**(11):3248-57. PubMed PMID: 22543281.
76. Hama A, Muramatsu H, Makishima H, et al. Molecular lesions in childhood and adult acute megakaryoblastic leukaemia. *Br J Haematol* 2012;**156**(3):316-25. PubMed PMID: 22122069.
77. Bourquin JP, Subramanian A, Langebrake C, et al. Identification of distinct molecular phenotypes in acute megakaryoblastic leukemia by gene expression profiling. *Proc Natl Acad Sci U S A* 2006;**103**(9):3339-44. PubMed PMID: 16492768. Pubmed Central PMCID: 1413912.
78. Tanaka MH, Giro EM, Cavalcante LB, et al. Expression of interferon-gamma, interferon-alpha and related genes in individuals with Down syndrome and periodontitis. *Cytokine* 2012;**60**(3):875-81. PubMed PMID: 22995210.
79. Azkona G, Amador-Arjona A, Obradors-Tarrago C, et al. Characterization of a mouse model overexpressing beta-site APP-cleaving enzyme 2 reveals a new role for BACE2. *Genes Brain Behav* 2010;**9**(2):160-72. PubMed PMID: 19840121.
80. Ramos EM, Latourelle JC, Lee JH, et al. Population stratification may bias analysis of PGC-1alpha as a modifier of age at Huntington disease motor onset. *Hum Genet* 2012;**131**(12):1833-40. PubMed PMID: 22825315. Pubmed Central PMCID: 3492689.
81. Bobrowska A, Donmez G, Weiss A, et al. SIRT2 ablation has no effect on tubulin acetylation in brain, cholesterol biosynthesis or the progression of Huntington's disease phenotypes in vivo. *PLoS One* 2012;**7**(4):e34805. PubMed PMID: 22511966. Pubmed Central PMCID: 3325254.

82. Moumne L, Campbell K, Howland D, et al. Genetic knock-down of HDAC3 does not modify disease-related phenotypes in a mouse model of Huntington's disease. *PLoS One* 2012;**7**(2):e31080. PubMed PMID: 22347433. Pubmed Central PMCID: 3275566.
83. Zuccato C, Marullo M, Vitali B, et al. Brain-derived neurotrophic factor in patients with Huntington's disease. *PLoS One* 2011;**6**(8):e22966. PubMed PMID: 21857974. Pubmed Central PMCID: 3155522.
84. Bobrowska A, Paganetti P, Matthias P, et al. Hdac6 knock-out increases tubulin acetylation but does not modify disease progression in the R6/2 mouse model of Huntington's disease. *PLoS One* 2011;**6**(6):e20696. PubMed PMID: 21677773. Pubmed Central PMCID: 3108987.
85. Goel A, Xicola RM, Nguyen TP, et al. Aberrant DNA methylation in hereditary nonpolyposis colorectal cancer without mismatch repair deficiency. *Gastroenterology* 2010;**138**(5):1854-62. PubMed PMID: 20102720. Pubmed Central PMCID: 2859993.
86. Mueller J, Gazzoli I, Bandipalliam P, et al. Comprehensive molecular analysis of mismatch repair gene defects in suspected Lynch syndrome (hereditary nonpolyposis colorectal cancer) cases. *Cancer Res* 2009;**69**(17):7053-61. PubMed PMID: 19690142. Pubmed Central PMCID: 2761236.
87. Bettstetter M, Dechant S, Ruemmele P, et al. Distinction of hereditary nonpolyposis colorectal cancer and sporadic microsatellite-unstable colorectal cancer through quantification of MLH1 methylation by real-time PCR. *Clin Cancer Res* 2007;**13**(11):3221-8. PubMed PMID: 17545526.
88. Perez-Carbonell L, Alenda C, Paya A, et al. Methylation analysis of MLH1 improves the selection of patients for genetic testing in Lynch syndrome. *J Mol Diagn* 2010;**12**(4):498-504. PubMed PMID: 20489114. Pubmed Central PMCID: 2893635.
89. Monteiro Santos EM, Valentin MD, Carneiro F, et al. Predictive models for mutations in mismatch repair genes: implication for genetic counseling in developing countries. *BMC Cancer* 2012;**12**:64. PubMed PMID: 22321913. Pubmed Central PMCID: 3305354.
90. Kuhle J, Pohl C, Mehling M, et al. Lack of association between antimyelin antibodies and progression to multiple sclerosis. *N Engl J Med* 2007;**356**(4):371-8. PubMed PMID: 17251533.
91. Lill CM, Liu T, Schjeide BM, et al. Closing the case of APOE in multiple sclerosis: no association with disease risk in over 29 000 subjects. *J Med Genet* 2012;**49**(9):558-62. PubMed PMID: 22972946.
92. Lorentzen AR, Karlsen TH, Olsson M, et al. Killer immunoglobulin-like receptor ligand HLA-Bw4 protects against multiple sclerosis. *Ann Neurol* 2009;**65**(6):658-66. PubMed PMID: 19630074.
93. Mildner A, Mack M, Schmidt H, et al. CCR2+Ly-6Chi monocytes are crucial for the effector phase of autoimmunity in the central nervous system. *Brain* 2009;**132**(Pt 9):2487-500. PubMed PMID: 19531531.
94. Alcina A, Abad-Grau Mdel M, Fedetz M, et al. Multiple sclerosis risk variant HLA-DRB1\*1501 associates with high expression of DRB1 gene in different human populations. *PLoS One* 2012;**7**(1):e29819. PubMed PMID: 22253788. Pubmed Central PMCID: 3258250.
95. Mathieson I, Munafo MR, Flint J. Meta-analysis indicates that common variants at the DISC1 locus are not associated with schizophrenia. *Mol Psychiatry* 2012;**17**(6):634-41. PubMed PMID: 21483435. Pubmed Central PMCID: 3359642.
96. Levinson DF, Shi J, Wang K, et al. Genome-wide association study of multiplex schizophrenia pedigrees. *Am J Psychiatry* 2012;**169**(9):963-73. PubMed PMID: 22885689.
97. Riley B, Thiselton D, Maher BS, et al. Replication of association between schizophrenia and ZNF804A in the Irish Case-Control Study of Schizophrenia sample. *Mol Psychiatry* 2010;**15**(1):29-37. PubMed PMID: 19844207. Pubmed Central PMCID: 2797562.
98. Carroll LS, Williams NM, Moskvina V, et al. Evidence for rare and common genetic risk variants for schizophrenia at protein kinase C, alpha. *Mol Psychiatry* 2010;**15**(11):1101-11. PubMed PMID: 19786960.

99. Wonodi I, Stine OC, Sathyaikumar KV, et al. Downregulated kynurenine 3-monooxygenase gene expression and enzyme activity in schizophrenia and genetic association with schizophrenia endophenotypes. *Arch Gen Psychiatry* 2011;**68**(7):665-74. PubMed PMID: 21727251.
100. Lewis S. Synaptic physiology: Meeting point for autism and fragile X syndrome. *Nat Rev Neurosci* 2012;**13**(11):740. PubMed PMID: 23047770.
101. State MW, Sestan N. Neuroscience. The emerging biology of autism spectrum disorders. *Science* 2012;**337**(6100):1301-3. PubMed PMID: 22984058.
102. Devlin B, Scherer SW. Genetic architecture in autism spectrum disorder. *Curr Opin Genet Dev* 2012;**22**(3):229-37. PubMed PMID: 22463983.
103. Malhotra D, Sebat J. CNVs: harbingers of a rare variant revolution in psychiatric genetics. *Cell* 2012;**148**(6):1223-41. PubMed PMID: 22424231. Pubmed Central PMCID: 3351385.
104. Mefford HC, Batshaw ML, Hoffman EP. Genomics, intellectual disability, and autism. *N Engl J Med* 2012;**366**(8):733-43. PubMed PMID: 22356326.
105. Lintas C, Sacco R, Persico AM. Genome-wide expression studies in autism spectrum disorder, Rett syndrome, and Down syndrome. *Neurobiol Dis* 2012;**45**(1):57-68. PubMed PMID: 21130877.
106. State MW, Levitt P. The conundrums of understanding genetic risks for autism spectrum disorders. *Nat Neurosci* 2011;**14**(12):1499-506. PubMed PMID: 22037497.
107. Holt R, Monaco AP. Links between genetics and pathophysiology in the autism spectrum disorders. *EMBO Mol Med* 2011;**3**(8):438-50. PubMed PMID: 21805639. Pubmed Central PMCID: 3377085.
108. State MW. The genetics of child psychiatric disorders: focus on autism and Tourette syndrome. *Neuron* 2010;**68**(2):254-69. PubMed PMID: 20955933. Pubmed Central PMCID: 3292208.
109. Bill BR, Geschwind DH. Genetic advances in autism: heterogeneity and convergence on shared pathways. *Curr Opin Genet Dev* 2009;**19**(3):271-8. PubMed PMID: 19477629. Pubmed Central PMCID: 2715429.
110. Anney R, Klei L, Pinto D, et al. Individual common variants exert weak effects on the risk for autism spectrum disorders. *Hum Mol Genet* 2012;**21**(21):4781-92. PubMed PMID: 22843504. Pubmed Central PMCID: 3471395.
111. Ben-David E, Shifman S. Networks of neuronal genes affected by common and rare variants in autism spectrum disorders. *PLoS Genet* 2012;**8**(3):e1002556. PubMed PMID: 22412387. Pubmed Central PMCID: 3297570.
112. Lu AT, Cantor RM. Allowing for sex differences increases power in a GWAS of multiplex Autism families. *Mol Psychiatry* 2012;**17**(2):215-22. PubMed PMID: 21151189.
113. St Pourcain B, Wang K, Glessner JT, et al. Association between a high-risk autism locus on 5p14 and social communication spectrum phenotypes in the general population. *Am J Psychiatry* 2010;**167**(11):1364-72. PubMed PMID: 20634369. Pubmed Central PMCID: 3008767.
114. Weiss LA, Arking DE, Gene Discovery Project of Johns H, et al. A genome-wide linkage and association scan reveals novel loci for autism. *Nature* 2009;**461**(7265):802-8. PubMed PMID: 19812673. Pubmed Central PMCID: 2772655.
115. Strom SP, Stone JL, Ten Bosch JR, et al. High-density SNP association study of the 17q21 chromosomal region linked to autism identifies CACNA1G as a novel candidate gene. *Mol Psychiatry* 2010;**15**(10):996-1005. PubMed PMID: 19455149. Pubmed Central PMCID: 2889141.
116. Allen-Brady K, Robison R, Cannon D, et al. Genome-wide linkage in Utah autism pedigrees. *Mol Psychiatry* 2010;**15**(10):1006-15. PubMed PMID: 19455147.
117. Wang K, Zhang H, Ma D, et al. Common genetic variants on 5p14.1 associate with autism spectrum disorders. *Nature* 2009;**459**(7246):528-33. PubMed PMID: 19404256. Pubmed Central PMCID: 2943511.

118. Maestrini E, Pagnamenta AT, Lamb JA, et al. High-density SNP association study and copy number variation analysis of the AUTS1 and AUTS5 loci implicate the IMMP2L-DOCK4 gene region in autism susceptibility. *Mol Psychiatry* 2010;**15**(9):954-68. PubMed PMID: 19401682. Pubmed Central PMCID: 2934739.
119. Allen-Brady K, Miller J, Matsunami N, et al. A high-density SNP genome-wide linkage scan in a large autism extended pedigree. *Mol Psychiatry* 2009;**14**(6):590-600. PubMed PMID: 18283277.
120. Newbury DF, Mari F, Sadighi Akha E, et al. Dual copy number variants involving 16p11 and 6q22 in a case of childhood apraxia of speech and pervasive developmental disorder. *Eur J Hum Genet* 2012. PubMed PMID: 22909776.
121. Griesi-Oliveira K, Moreira Dde P, Davis-Wright N, et al. A complex chromosomal rearrangement involving chromosomes 2, 5, and X in autism spectrum disorder. *Am J Med Genet B Neuropsychiatr Genet* 2012;**159B**(5):529-36. PubMed PMID: 22592906.
122. Tabet AC, Pilorge M, Delorme R, et al. Autism multiplex family with 16p11.2p12.2 microduplication syndrome in monozygotic twins and distal 16p11.2 deletion in their brother. *Eur J Hum Genet* 2012;**20**(5):540-6. PubMed PMID: 22234155. Pubmed Central PMCID: 3330222.
123. Griswold AJ, Ma D, Sacharow SJ, et al. A de novo 1.5 Mb microdeletion on chromosome 14q23.2-23.3 in a patient with autism and spherocytosis. *Autism Res* 2011;**4**(3):221-7. PubMed PMID: 21360829. Pubmed Central PMCID: 3110642.
124. Wisniowiecka-Kowalnik B, Nesteruk M, Peters SU, et al. Intragenic rearrangements in NRXN1 in three families with autism spectrum disorder, developmental delay, and speech delay. *Am J Med Genet B Neuropsychiatr Genet* 2010;**153B**(5):983-93. PubMed PMID: 20162629.
125. Castermans D, Volders K, Crepel A, et al. SCAMP5, NBEA and AMISYN: three candidate genes for autism involved in secretion of large dense-core vesicles. *Hum Mol Genet* 2010;**19**(7):1368-78. PubMed PMID: 20071347.
126. Willemsen MH, Fernandez BA, Bacino CA, et al. Identification of ANKRD11 and ZNF778 as candidate genes for autism and variable cognitive impairment in the novel 16q24.3 microdeletion syndrome. *Eur J Hum Genet* 2010;**18**(4):429-35. PubMed PMID: 19920853. Pubmed Central PMCID: 2987261.
127. Fernandez BA, Roberts W, Chung B, et al. Phenotypic spectrum associated with de novo and inherited deletions and duplications at 16p11.2 in individuals ascertained for diagnosis of autism spectrum disorder. *J Med Genet* 2010;**47**(3):195-203. PubMed PMID: 19755429.
128. Pagnamenta AT, Wing K, Sadighi Akha E, et al. A 15q13.3 microdeletion segregating with autism. *Eur J Hum Genet* 2009;**17**(5):687-92. PubMed PMID: 19050728. Pubmed Central PMCID: 2986268.
129. Laumonnier F, Roger S, Guerin P, et al. Association of a functional deficit of the BKCa channel, a synaptic regulator of neuronal excitability, with autism and mental retardation. *Am J Psychiatry* 2006;**163**(9):1622-9. PubMed PMID: 16946189.
130. Moreno-De-Luca D, Sanders SJ, Willsey AJ, et al. Using large clinical data sets to infer pathogenicity for rare copy number variants in autism cohorts. *Mol Psychiatry* 2012. PubMed PMID: 23044707.
131. Girirajan S, Rosenfeld JA, Coe BP, et al. Phenotypic heterogeneity of genomic disorders and rare copy-number variants. *N Engl J Med* 2012;**367**(14):1321-31. PubMed PMID: 22970919.
132. Neale BM, Kou Y, Liu L, et al. Patterns and rates of exonic de novo mutations in autism spectrum disorders. *Nature* 2012;**485**(7397):242-5. PubMed PMID: 22495311.
133. Sanders SJ, Ercan-Sencicek AG, Hus V, et al. Multiple recurrent de novo CNVs, including duplications of the 7q11.23 Williams syndrome region, are strongly associated with autism. *Neuron* 2011;**70**(5):863-85. PubMed PMID: 21658581.

134. Gai X, Xie HM, Perin JC, et al. Rare structural variation of synapse and neurotransmission genes in autism. *Mol Psychiatry* 2012;**17**(4):402-11. PubMed PMID: 21358714. Pubmed Central PMCID: 3314176.
135. Pinto D, Pagnamenta AT, Klei L, et al. Functional impact of global rare copy number variation in autism spectrum disorders. *Nature* 2010;**466**(7304):368-72. PubMed PMID: 20531469. Pubmed Central PMCID: 3021798.
136. Glessner JT, Wang K, Cai G, et al. Autism genome-wide copy number variation reveals ubiquitin and neuronal genes. *Nature* 2009;**459**(7246):569-73. PubMed PMID: 19404257. Pubmed Central PMCID: 2925224.
137. Weiss LA, Shen Y, Korn JM, et al. Association between microdeletion and microduplication at 16p11.2 and autism. *N Engl J Med* 2008;**358**(7):667-75. PubMed PMID: 18184952.
138. Hsiao EY, McBride SW, Chow J, et al. Modeling an autism risk factor in mice leads to permanent immune dysregulation. *Proc Natl Acad Sci U S A* 2012;**109**(31):12776-81. PubMed PMID: 22802640. Pubmed Central PMCID: 3411999.
139. Gandal MJ, Anderson RL, Billingslea EN, et al. Mice with reduced NMDA receptor expression: more consistent with autism than schizophrenia? *Genes Brain Behav* 2012;**11**(6):740-50. PubMed PMID: 22726567.
140. Horev G, Ellegood J, Lerch JP, et al. Dosage-dependent phenotypes in models of 16p11.2 lesions found in autism. *Proc Natl Acad Sci U S A* 2011;**108**(41):17076-81. PubMed PMID: 21969575. Pubmed Central PMCID: 3193230.
141. Hiramoto T, Kang G, Suzuki G, et al. Tbx1: identification of a 22q11.2 gene as a risk factor for autism spectrum disorder in a mouse model. *Hum Mol Genet* 2011;**20**(24):4775-85. PubMed PMID: 21908517. Pubmed Central PMCID: 3221538.
142. Giza J, Urbanski MJ, Prestori F, et al. Behavioral and cerebellar transmission deficits in mice lacking the autism-linked gene islet brain-2. *J Neurosci* 2010;**30**(44):14805-16. PubMed PMID: 21048139. Pubmed Central PMCID: 3200367.
143. Feyder M, Karlsson RM, Mathur P, et al. Association of mouse Dlg4 (PSD-95) gene deletion and human DLG4 gene variation with phenotypes relevant to autism spectrum disorders and Williams' syndrome. *Am J Psychiatry* 2010;**167**(12):1508-17. PubMed PMID: 20952458. Pubmed Central PMCID: 3146008.
144. Silverman JL, Turner SM, Barkan CL, et al. Sociability and motor functions in Shank1 mutant mice. *Brain Res* 2011;**1380**:120-37. PubMed PMID: 20868654. Pubmed Central PMCID: 3041833.
145. Zaccaria KJ, Lagace DC, Eisch AJ, et al. Resistance to change and vulnerability to stress: autistic-like features of GAP43-deficient mice. *Genes Brain Behav* 2010;**9**(8):985-96. PubMed PMID: 20707874. Pubmed Central PMCID: 2975747.
146. Moy SS, Nadler JJ, Young NB, et al. Social approach in genetically engineered mouse lines relevant to autism. *Genes Brain Behav* 2009;**8**(2):129-42. PubMed PMID: 19016890. Pubmed Central PMCID: 2659808.
147. Sadakata T, Washida M, Iwayama Y, et al. Autistic-like phenotypes in Cadps2-knockout mice and aberrant CADPS2 splicing in autistic patients. *J Clin Invest* 2007;**117**(4):931-43. PubMed PMID: 17380209. Pubmed Central PMCID: 1821065.
148. Sanders SJ, Murtha MT, Gupta AR, et al. De novo mutations revealed by whole-exome sequencing are strongly associated with autism. *Nature* 2012;**485**(7397):237-41. PubMed PMID: 22495306.
149. Puffenberger EG, Jinks RN, Wang H, et al. A Homozygous Missense Mutation in HERC2 Associated with Global Developmental Delay and Autism Spectrum Disorder. *Hum Mutat* 2012. PubMed PMID: 23065719.

150. Bi C, Wu J, Jiang T, et al. Mutations of ANK3 identified by exome sequencing are associated with Autism susceptibility. *Hum Mutat* 2012. PubMed PMID: 22865819.
151. Chahrour MH, Yu TW, Lim ET, et al. Whole-exome sequencing and homozygosity analysis implicate depolarization-regulated neuronal genes in autism. *PLoS Genet* 2012;**8**(4):e1002635. PubMed PMID: 22511880. Pubmed Central PMCID: 3325173.
152. O'Roak BJ, Deriziotis P, Lee C, et al. Exome sequencing in sporadic autism spectrum disorders identifies severe de novo mutations. *Nat Genet* 2011;**43**(6):585-9. PubMed PMID: 21572417. Pubmed Central PMCID: 3115696.
153. Konopka G, Wexler E, Rosen E, et al. Modeling the functional genomics of autism using human neurons. *Mol Psychiatry* 2012;**17**(2):202-14. PubMed PMID: 21647150. Pubmed Central PMCID: 3170664.
154. Oskvig DB, Elkahloun AG, Johnson KR, et al. Maternal immune activation by LPS selectively alters specific gene expression profiles of interneuron migration and oxidative stress in the fetus without triggering a fetal immune response. *Brain Behav Immun* 2012;**26**(4):623-34. PubMed PMID: 22310921. Pubmed Central PMCID: 3285385.
155. Mondal K, Ramachandran D, Patel VC, et al. Excess variants in AFF2 detected by massively parallel sequencing of males with autism spectrum disorder. *Hum Mol Genet* 2012;**21**(19):4356-64. PubMed PMID: 22773736. Pubmed Central PMCID: 3441129.
156. Anitha A, Nakamura K, Thanseem I, et al. Downregulation of the Expression of Mitochondrial Electron Transport Complex Genes in Autism Brains. *Brain Pathol* 2012. PubMed PMID: 23088660.
157. Voineagu I, Wang X, Johnston P, et al. Transcriptomic analysis of autistic brain reveals convergent molecular pathology. *Nature* 2011;**474**(7351):380-4. PubMed PMID: 21614001.
158. Kuwano Y, Kamio Y, Kawai T, et al. Autism-associated gene expression in peripheral leucocytes commonly observed between subjects with autism and healthy women having autistic children. *PLoS One* 2011;**6**(9):e24723. PubMed PMID: 21935445. Pubmed Central PMCID: 3174190.
159. Lintas C, Sacco R, Garbett K, et al. Involvement of the PRKCB1 gene in autistic disorder: significant genetic association and reduced neocortical gene expression. *Mol Psychiatry* 2009;**14**(7):705-18. PubMed PMID: 18317465.
160. Lepagnol-Bestel AM, Maussion G, Boda B, et al. SLC25A12 expression is associated with neurite outgrowth and is upregulated in the prefrontal cortex of autistic subjects. *Mol Psychiatry* 2008;**13**(4):385-97. PubMed PMID: 18180767.
161. Alarcon M, Abrahams BS, Stone JL, et al. Linkage, association, and gene-expression analyses identify CNTNAP2 as an autism-susceptibility gene. *Am J Hum Genet* 2008;**82**(1):150-9. PubMed PMID: 18179893. Pubmed Central PMCID: 2253955.
162. Jamain S, Quach H, Betancur C, et al. Mutations of the X-linked genes encoding neuroligins NLGN3 and NLGN4 are associated with autism. *Nat Genet* 2003;**34**(1):27-9. PubMed PMID: 12669065. Pubmed Central PMCID: 1925054.
163. Bressler JP, Gillin PK, O'Driscoll C, et al. Maternal antibody reactivity to lymphocytes of offspring with autism. *Pediatr Neurol* 2012;**47**(5):337-40. PubMed PMID: 23044014.
164. Abu Shmais GA, Al-Ayadhi LY, Al-Dbass AM, et al. Mechanism of nitrogen metabolism-related parameters and enzyme activities in the pathophysiology of autism. *J Neurodev Disord* 2012;**4**(1):4. PubMed PMID: 22958401. Pubmed Central PMCID: 3374296.
165. Onore C, Van de Water J, Ashwood P. Decreased levels of EGF in plasma of children with autism spectrum disorder. *Autism Res Treat* 2012;**2012**:205362. PubMed PMID: 22937258. Pubmed Central PMCID: 3420731.
166. Al-Ayadhi LY, Mostafa GA. Elevated serum levels of interleukin-17A in children with autism. *J Neuroinflammation* 2012;**9**:158. PubMed PMID: 22748016. Pubmed Central PMCID: 3410815.

167. Hammock E, Veenstra-VanderWeele J, Yan Z, et al. Examining autism spectrum disorders by biomarkers: example from the oxytocin and serotonin systems. *J Am Acad Child Adolesc Psychiatry* 2012;**51**(7):712-21 e1. PubMed PMID: 22721594.
168. Wasilewska J, Kaczmarek M, Stasiak-Barmuta A, et al. Low serum IgA and increased expression of CD23 on B lymphocytes in peripheral blood in children with regressive autism aged 3-6 years old. *Arch Med Sci* 2012;**8**(2):324-31. PubMed PMID: 22662007. Pubmed Central PMCID: 3361046.
169. Manzardo AM, Henkhaus R, Dhillon S, et al. Plasma cytokine levels in children with autistic disorder and unrelated siblings. *Int J Dev Neurosci* 2012;**30**(2):121-7. PubMed PMID: 22197967.
170. Iwata K, Matsuzaki H, Miyachi T, et al. Investigation of the serum levels of anterior pituitary hormones in male children with autism. *Mol Autism* 2011;**2**:16. PubMed PMID: 22011527. Pubmed Central PMCID: 3215952.
171. Goines PE, Croen LA, Braunschweig D, et al. Increased midgestational IFN-gamma, IL-4 and IL-5 in women bearing a child with autism: A case-control study. *Mol Autism* 2011;**2**:13. PubMed PMID: 21810230. Pubmed Central PMCID: 3170586.
172. Fatemi SH, Stary JM, Egan EA. Reduced blood levels of reelin as a vulnerability factor in pathophysiology of autistic disorder. *Cell Mol Neurobiol* 2002;**22**(2):139-52. PubMed PMID: 12363196.
173. Anderson GR, Galfin T, Xu W, et al. Candidate autism gene screen identifies critical role for cell-adhesion molecule CASPR2 in dendritic arborization and spine development. *Proc Natl Acad Sci U S A* 2012;**109**(44):18120-5. PubMed PMID: 23074245.
174. Whalley HC, O'Connell G, Sussmann JE, et al. Genetic variation in CNTNAP2 alters brain function during linguistic processing in healthy individuals. *Am J Med Genet B Neuropsychiatr Genet* 2011;**156B**(8):941-8. PubMed PMID: 21987501.
175. Gregor A, Albrecht B, Bader I, et al. Expanding the clinical spectrum associated with defects in CNTNAP2 and NRXN1. *BMC Med Genet* 2011;**12**:106. PubMed PMID: 21827697. Pubmed Central PMCID: 3162517.
176. Petrin AL, Giacheti CM, Maximino LP, et al. Identification of a microdeletion at the 7q33-q35 disrupting the CNTNAP2 gene in a Brazilian stuttering case. *Am J Med Genet A* 2010;**152A**(12):3164-72. PubMed PMID: 21108403. Pubmed Central PMCID: 3058358.
177. Sehested LT, Moller RS, Bache I, et al. Deletion of 7q34-q36.2 in two siblings with mental retardation, language delay, primary amenorrhea, and dysmorphic features. *Am J Med Genet A* 2010;**152A**(12):3115-9. PubMed PMID: 21082657.
178. Poot M, Beyer V, Schwaab I, et al. Disruption of CNTNAP2 and additional structural genome changes in a boy with speech delay and autism spectrum disorder. *Neurogenetics* 2010;**11**(1):81-9. PubMed PMID: 19582487.
179. Arking DE, Cutler DJ, Brune CW, et al. A common genetic variant in the neurexin superfamily member CNTNAP2 increases familial risk of autism. *Am J Hum Genet* 2008;**82**(1):160-4. PubMed PMID: 18179894. Pubmed Central PMCID: 2253968.
180. Hatton DD, Sideris J, Skinner M, et al. Autistic behavior in children with fragile X syndrome: prevalence, stability, and the impact of FMRP. *Am J Med Genet A* 2006;**140A**(17):1804-13. PubMed PMID: 16700053.
181. Hessler D, Wang JM, Schneider A, et al. Decreased fragile X mental retardation protein expression underlies amygdala dysfunction in carriers of the fragile X premutation. *Biol Psychiatry* 2011;**70**(9):859-65. PubMed PMID: 21783174. Pubmed Central PMCID: 3191264.
182. Lee TL, Raygada MJ, Rennert OM. Integrative gene network analysis provides novel regulatory relationships, genetic contributions and susceptible targets in autism spectrum disorders. *Gene* 2012;**496**(2):88-96. PubMed PMID: 22306264. Pubmed Central PMCID: 3303594.

183. Madrigal I, Rodriguez-Revenga L, Xuncla M, et al. 15q11.2 microdeletion and FMR1 premutation in a family with intellectual disabilities and autism. *Gene* 2012;**508**(1):92-5. PubMed PMID: 22842191.
184. Chonchaiya W, Tassone F, Ashwood P, et al. Autoimmune disease in mothers with the FMR1 premutation is associated with seizures in their children with fragile X syndrome. *Hum Genet* 2010;**128**(5):539-48. PubMed PMID: 20809278. Pubmed Central PMCID: 2955238.
185. Klauck SM, Munstermann E, Bieber-Martig B, et al. Molecular genetic analysis of the FMR-1 gene in a large collection of autistic patients. *Hum Genet* 1997;**100**(2):224-9. PubMed PMID: 9254854.
186. Griswold AJ, Ma D, Cukier HN, et al. Evaluation of copy number variations reveals novel candidate genes in autism spectrum disorder-associated pathways. *Hum Mol Genet* 2012;**21**(15):3513-23. PubMed PMID: 22543975. Pubmed Central PMCID: 3392110.
187. Nishimura Y, Martin CL, Vazquez-Lopez A, et al. Genome-wide expression profiling of lymphoblastoid cell lines distinguishes different forms of autism and reveals shared pathways. *Hum Mol Genet* 2007;**16**(14):1682-98. PubMed PMID: 17519220.
188. Tassone F, Choudhary NS, Tassone F, et al. Identification of Expanded Alleles of the FMR1 Gene in the CHildhood Autism Risks from Genes and Environment (CHARGE) Study. *J Autism Dev Disord* 2012. PubMed PMID: 22767137.
189. Iossifov I, Ronemus M, Levy D, et al. De novo gene disruptions in children on the autistic spectrum. *Neuron* 2012;**74**(2):285-99. PubMed PMID: 22542183.
190. Moessner R, Marshall CR, Sutcliffe JS, et al. Contribution of SHANK3 mutations to autism spectrum disorder. *Am J Hum Genet* 2007;**81**(6):1289-97. PubMed PMID: 17999366. Pubmed Central PMCID: 2276348.
191. Gauthier J, Spiegelman D, Piton A, et al. Novel de novo SHANK3 mutation in autistic patients. *Am J Med Genet B Neuropsychiatr Genet* 2009;**150B**(3):421-4. PubMed PMID: 18615476.
192. Lesca G, Rudolf G, Labalme A, et al. Epileptic encephalopathies of the Landau-Kleffner and continuous spike and waves during slow-wave sleep types: genomic dissection makes the link with autism. *Epilepsia* 2012;**53**(9):1526-38. PubMed PMID: 22738016.
193. Boccuto L, Lauri M, Sarasua SM, et al. Prevalence of SHANK3 variants in patients with different subtypes of autism spectrum disorders. *Eur J Hum Genet* 2012. PubMed PMID: 22892527.
194. Sykes NH, Toma C, Wilson N, et al. Copy number variation and association analysis of SHANK3 as a candidate gene for autism in the IMGSAC collection. *Eur J Hum Genet* 2009;**17**(10):1347-53. PubMed PMID: 19384346. Pubmed Central PMCID: 2752466.
195. Sarasua SM, Dwivedi A, Boccuto L, et al. Association between deletion size and important phenotypes expands the genomic region of interest in Phelan-McDermid syndrome (22q13 deletion syndrome). *J Med Genet* 2011;**48**(11):761-6. PubMed PMID: 21984749.
196. Durand CM, Perroy J, Loll F, et al. SHANK3 mutations identified in autism lead to modification of dendritic spine morphology via an actin-dependent mechanism. *Mol Psychiatry* 2012;**17**(1):71-84. PubMed PMID: 21606927. Pubmed Central PMCID: 3252613.
197. Durand CM, Betancur C, Boeckers TM, et al. Mutations in the gene encoding the synaptic scaffolding protein SHANK3 are associated with autism spectrum disorders. *Nat Genet* 2007;**39**(1):25-7. PubMed PMID: 17173049. Pubmed Central PMCID: 2082049.
198. Kelleher RJ, 3rd, Geigenmuller U, Hovhannisyann H, et al. High-throughput sequencing of mGluR signaling pathway genes reveals enrichment of rare variants in autism. *PLoS One* 2012;**7**(4):e35003. PubMed PMID: 22558107. Pubmed Central PMCID: 3338748.
199. Campbell DB, Sutcliffe JS, Ebert PJ, et al. A genetic variant that disrupts MET transcription is associated with autism. *Proc Natl Acad Sci U S A* 2006;**103**(45):16834-9. PubMed PMID: 17053076. Pubmed Central PMCID: 1838551.



200. Campbell DB, Buie TM, Winter H, et al. Distinct genetic risk based on association of MET in families with co-occurring autism and gastrointestinal conditions. *Pediatrics* 2009;**123**(3):1018-24. PubMed PMID: 19255034.
201. Thanseem I, Nakamura K, Miyachi T, et al. Further evidence for the role of MET in autism susceptibility. *Neurosci Res* 2010;**68**(2):137-41. PubMed PMID: 20615438.
202. Mukamel Z, Konopka G, Wexler E, et al. Regulation of MET by FOXP2, genes implicated in higher cognitive dysfunction and autism risk. *J Neurosci* 2011;**31**(32):11437-42. PubMed PMID: 21832174.
203. Judson MC, Bergman MY, Campbell DB, et al. Dynamic gene and protein expression patterns of the autism-associated met receptor tyrosine kinase in the developing mouse forebrain. *J Comp Neurol* 2009;**513**(5):511-31. PubMed PMID: 19226509. Pubmed Central PMCID: 2647986.
204. Sousa I, Clark TG, Toma C, et al. MET and autism susceptibility: family and case-control studies. *Eur J Hum Genet* 2009;**17**(6):749-58. PubMed PMID: 19002214. Pubmed Central PMCID: 2685893.
205. Jackson PB, Boccuto L, Skinner C, et al. Further evidence that the rs1858830 C variant in the promoter region of the MET gene is associated with autistic disorder. *Autism Res* 2009;**2**(4):232-6. PubMed PMID: 19681062.
206. Eagleson KL, Campbell DB, Thompson BL, et al. The autism risk genes MET and PLAUR differentially impact cortical development. *Autism Res* 2011;**4**(1):68-83. PubMed PMID: 21328570.
207. Campbell DB, Li C, Sutcliffe JS, et al. Genetic evidence implicating multiple genes in the MET receptor tyrosine kinase pathway in autism spectrum disorder. *Autism Res* 2008;**1**(3):159-68. PubMed PMID: 19360663. Pubmed Central PMCID: 2678909.
208. Campbell DB, Warren D, Sutcliffe JS, et al. Association of MET with social and communication phenotypes in individuals with autism spectrum disorder. *Am J Med Genet B Neuropsychiatr Genet* 2010;**153B**(2):438-46. PubMed PMID: 19548256.
209. Ma DQ, Rabionet R, Konidari I, et al. Association and gene-gene interaction of SLC6A4 and ITGB3 in autism. *Am J Med Genet B Neuropsychiatr Genet* 2010;**153B**(2):477-83. PubMed PMID: 19588468.
210. Brune CW, Kim SJ, Salt J, et al. 5-HTTLPR Genotype-Specific Phenotype in Children and Adolescents With Autism. *Am J Psychiatry* 2006;**163**(12):2148-56. PubMed PMID: 17151167.
211. Wassink TH, Hazlett HC, Epping EA, et al. Cerebral cortical gray matter overgrowth and functional variation of the serotonin transporter gene in autism. *Arch Gen Psychiatry* 2007;**64**(6):709-17. PubMed PMID: 17548752.
212. Cho IH, Yoo HJ, Park M, et al. Family-based association study of 5-HTTLPR and the 5-HT2A receptor gene polymorphisms with autism spectrum disorder in Korean trios. *Brain Res* 2007;**1139**:34-41. PubMed PMID: 17280648.
213. Guhathakurta S, Sinha S, Ghosh S, et al. Population-based association study and contrasting linkage disequilibrium pattern reveal genetic association of SLC6A4 with autism in the Indian population from West Bengal. *Brain Res* 2008;**1240**:12-21. PubMed PMID: 18804097.
214. Longo D, Schuler-Faccini L, Brandalize AP, et al. Influence of the 5-HTTLPR polymorphism and environmental risk factors in a Brazilian sample of patients with autism spectrum disorders. *Brain Res* 2009;**1267**:9-17. PubMed PMID: 19281802.
215. Arieff Z, Kaur M, Gameeldien H, et al. 5-HTTLPR polymorphism: analysis in South African autistic individuals. *Hum Biol* 2010;**82**(3):291-300. PubMed PMID: 20649385.
216. Coutinho AM, Sousa I, Martins M, et al. Evidence for epistasis between SLC6A4 and ITGB3 in autism etiology and in the determination of platelet serotonin levels. *Hum Genet* 2007;**121**(2):243-56. PubMed PMID: 17203304.
217. Coutinho AM, Oliveira G, Morgadinho T, et al. Variants of the serotonin transporter gene (SLC6A4) significantly contribute to hyperserotonemia in autism. *Mol Psychiatry* 2004;**9**(3):264-71. PubMed PMID: 15094787.

218. Endo T, Kitamura H, Tamura R, et al. 5-HTTLPR polymorphism influences prefrontal neurochemical metabolites in autism spectrum disorder. *Psychiatry Res* 2010;**183**(2):170-3. PubMed PMID: 20619617.
219. Thanseem I, Anitha A, Nakamura K, et al. Elevated transcription factor specificity protein 1 in autistic brains alters the expression of autism candidate genes. *Biol Psychiatry* 2012;**71**(5):410-8. PubMed PMID: 22030357.
220. Tavassoli T, Auyeung B, Murphy LC, et al. Variation in the autism candidate gene GABRB3 modulates tactile sensitivity in typically developing children. *Mol Autism* 2012;**3**(1):6. PubMed PMID: 22769427. Pubmed Central PMCID: 3434022.
221. Jiao Y, Chen R, Ke X, et al. Single nucleotide polymorphisms predict symptom severity of autism spectrum disorder. *J Autism Dev Disord* 2012;**42**(6):971-83. PubMed PMID: 21786105. Pubmed Central PMCID: 3244507.
222. Jiao Y, Chen R, Ke X, et al. Predictive models for subtypes of autism spectrum disorder based on single-nucleotide polymorphisms and magnetic resonance imaging. *Adv Med Sci* 2011;**56**(2):334-42. PubMed PMID: 22037176.
223. Delahanty RJ, Kang JQ, Brune CW, et al. Maternal transmission of a rare GABRB3 signal peptide variant is associated with autism. *Mol Psychiatry* 2011;**16**(1):86-96. PubMed PMID: 19935738. Pubmed Central PMCID: 3428055.
224. Cai G, Edelmann L, Goldsmith JE, et al. Multiplex ligation-dependent probe amplification for genetic screening in autism spectrum disorders: efficient identification of known microduplications and identification of a novel microduplication in ASMT. *BMC Med Genomics* 2008;**1**:50. PubMed PMID: 18925931. Pubmed Central PMCID: 2588447.
225. Kim SA, Kim JH, Park M, et al. Association of GABRB3 polymorphisms with autism spectrum disorders in Korean trios. *Neuropsychobiology* 2006;**54**(3):160-5. PubMed PMID: 17230033.
226. Ashley-Koch AE, Mei H, Jaworski J, et al. An analysis paradigm for investigating multi-locus effects in complex disease: examination of three GABA receptor subunit genes on 15q11-q13 as risk factors for autistic disorder. *Ann Hum Genet* 2006;**70**(Pt 3):281-92. PubMed PMID: 16674551.
227. Samaco RC, Hogart A, LaSalle JM. Epigenetic overlap in autism-spectrum neurodevelopmental disorders: MECP2 deficiency causes reduced expression of UBE3A and GABRB3. *Hum Mol Genet* 2005;**14**(4):483-92. PubMed PMID: 15615769. Pubmed Central PMCID: 1224722.
228. Cukier HN, Lee JM, Ma D, et al. The Expanding Role of MBD Genes in Autism: Identification of a MECP2 Duplication and Novel Alterations in MBD5, MBD6, and SETDB1. *Autism Res* 2012. PubMed PMID: 23055267.
229. Xi CY, Lu Y, Tan YH, et al. Analysis of MECP2 gene copy number in boys with autism. *J Child Neurol* 2011;**26**(5):570-3. PubMed PMID: 21531908.
230. Piton A, Gauthier J, Hamdan FF, et al. Systematic resequencing of X-chromosome synaptic genes in autism spectrum disorder and schizophrenia. *Mol Psychiatry* 2011;**16**(8):867-80. PubMed PMID: 20479760. Pubmed Central PMCID: 3289139.
231. Psoni S, Sofocleous C, Traeger-Synodinos J, et al. Phenotypic and genotypic variability in four males with MECP2 gene sequence aberrations including a novel deletion. *Pediatr Res* 2010;**67**(5):551-6. PubMed PMID: 20098342.
232. Nagarajan RP, Patzel KA, Martin M, et al. MECP2 promoter methylation and X chromosome inactivation in autism. *Autism Res* 2008;**1**(3):169-78. PubMed PMID: 19132145. Pubmed Central PMCID: 2614877.
233. Loat CS, Curran S, Lewis CM, et al. Methyl-CpG-binding protein 2 polymorphisms and vulnerability to autism. *Genes Brain Behav* 2008;**7**(7):754-60. PubMed PMID: 19125863.

234. Gong X, Bacchelli E, Blasi F, et al. Analysis of X chromosome inactivation in autism spectrum disorders. *Am J Med Genet B Neuropsychiatr Genet* 2008;**147B**(6):830-5. PubMed PMID: 18361425.
235. Nagarajan RP, Hogart AR, Gwye Y, et al. Reduced MeCP2 expression is frequent in autism frontal cortex and correlates with aberrant MECP2 promoter methylation. *Epigenetics* 2006;**1**(4):e1-11. PubMed PMID: 17486179. Pubmed Central PMCID: 1866172.
236. Coutinho AM, Oliveira G, Katz C, et al. MECP2 coding sequence and 3'UTR variation in 172 unrelated autistic patients. *Am J Med Genet B Neuropsychiatr Genet* 2007;**144B**(4):475-83. PubMed PMID: 17427193.
237. Rodriguez-Escudero I, Oliver MD, Andres-Pons A, et al. A comprehensive functional analysis of PTEN mutations: implications in tumor- and autism-related syndromes. *Hum Mol Genet* 2011;**20**(21):4132-42. PubMed PMID: 21828076.
238. Stein MT, Elias ER, Saenz M, et al. Autistic spectrum disorder in a 9-year-old girl with macrocephaly. *J Dev Behav Pediatr* 2010;**31**(7):632-4. PubMed PMID: 20814261.
239. Redfern RE, Daou MC, Li L, et al. A mutant form of PTEN linked to autism. *Protein Sci* 2010;**19**(10):1948-56. PubMed PMID: 20718038. Pubmed Central PMCID: 2998728.
240. McBride KL, Varga EA, Pastore MT, et al. Confirmation study of PTEN mutations among individuals with autism or developmental delays/mental retardation and macrocephaly. *Autism Res* 2010;**3**(3):137-41. PubMed PMID: 20533527.
241. Varga EA, Pastore M, Prior T, et al. The prevalence of PTEN mutations in a clinical pediatric cohort with autism spectrum disorders, developmental delay, and macrocephaly. *Genet Med* 2009;**11**(2):111-7. PubMed PMID: 19265751.
242. Orrico A, Galli L, Buoni S, et al. Novel PTEN mutations in neurodevelopmental disorders and macrocephaly. *Clin Genet* 2009;**75**(2):195-8. PubMed PMID: 18759867.
243. Buxbaum JD, Cai G, Chaste P, et al. Mutation screening of the PTEN gene in patients with autism spectrum disorders and macrocephaly. *Am J Med Genet B Neuropsychiatr Genet* 2007;**144B**(4):484-91. PubMed PMID: 17427195. Pubmed Central PMCID: 3381648.
244. Herman GE, Butter E, Enrile B, et al. Increasing knowledge of PTEN germline mutations: Two additional patients with autism and macrocephaly. *Am J Med Genet A* 2007;**143**(6):589-93. PubMed PMID: 17286265.
245. Butler MG, Dasouki MJ, Zhou XP, et al. Subset of individuals with autism spectrum disorders and extreme macrocephaly associated with germline PTEN tumour suppressor gene mutations. *J Med Genet* 2005;**42**(4):318-21. PubMed PMID: 15805158. Pubmed Central PMCID: 1736032.
246. Liu Y, Hu Z, Xun G, et al. Mutation analysis of the NRXN1 gene in a Chinese autism cohort. *J Psychiatr Res* 2012;**46**(5):630-4. PubMed PMID: 22405623.
247. Voineskos AN, Lett TA, Lerch JP, et al. Neurexin-1 and frontal lobe white matter: an overlapping intermediate phenotype for schizophrenia and autism spectrum disorders. *PLoS One* 2011;**6**(6):e20982. PubMed PMID: 21687627. Pubmed Central PMCID: 3110800.
248. Soysal Y, Vermeesch J, Davani NA, et al. A 10.46 Mb 12p11.1-12.1 interstitial deletion coincident with a 0.19 Mb NRXN1 deletion detected by array CGH in a girl with scoliosis and autism. *Am J Med Genet A* 2011;**155A**(7):1745-52. PubMed PMID: 21626680.
249. Gauthier J, Siddiqui TJ, Huashan P, et al. Truncating mutations in NRXN2 and NRXN1 in autism spectrum disorders and schizophrenia. *Hum Genet* 2011;**130**(4):563-73. PubMed PMID: 21424692. Pubmed Central PMCID: 3204930.
250. Ching MS, Shen Y, Tan WH, et al. Deletions of NRXN1 (neurexin-1) predispose to a wide spectrum of developmental disorders. *Am J Med Genet B Neuropsychiatr Genet* 2010;**153B**(4):937-47. PubMed PMID: 20468056. Pubmed Central PMCID: 3001124.

251. Bucan M, Abrahams BS, Wang K, et al. Genome-wide analyses of exonic copy number variants in a family-based study point to novel autism susceptibility genes. *PLoS Genet* 2009;**5**(6):e1000536. PubMed PMID: 19557195. Pubmed Central PMCID: 2695001.
252. Kim HG, Kishikawa S, Higgins AW, et al. Disruption of neurexin 1 associated with autism spectrum disorder. *Am J Hum Genet* 2008;**82**(1):199-207. PubMed PMID: 18179900. Pubmed Central PMCID: 2253961.
253. Lin PI, Chien YL, Wu YY, et al. The WNT2 gene polymorphism associated with speech delay inherent to autism. *Res Dev Disabil* 2012;**33**(5):1533-40. PubMed PMID: 22522212.
254. Choi J, Ababon MR, Matteson PG, et al. Cut-like homeobox 1 and nuclear factor I/B mediate ENGRAILED2 autism spectrum disorder-associated haplotype function. *Hum Mol Genet* 2012;**21**(7):1566-80. PubMed PMID: 22180456. Pubmed Central PMCID: 3298280.
255. Yang P, Shu BC, Hallmayer JF, et al. Intronic single nucleotide polymorphisms of engrailed homeobox 2 modulate the disease vulnerability of autism in a han chinese population. *Neuropsychobiology* 2010;**62**(2):104-15. PubMed PMID: 20523082.
256. Sen B, Singh AS, Sinha S, et al. Family-based studies indicate association of Engrailed 2 gene with autism in an Indian population. *Genes Brain Behav* 2010;**9**(2):248-55. PubMed PMID: 20050924.
257. Benayed R, Choi J, Matteson PG, et al. Autism-associated haplotype affects the regulation of the homeobox gene, ENGRAILED 2. *Biol Psychiatry* 2009;**66**(10):911-7. PubMed PMID: 19615670. Pubmed Central PMCID: 2783416.
258. Yang P, Lung FW, Jong YJ, et al. Association of the homeobox transcription factor gene ENGRAILED 2 with autistic disorder in Chinese children. *Neuropsychobiology* 2008;**57**(1-2):3-8. PubMed PMID: 18424904.
259. Wang L, Jia M, Yue W, et al. Association of the ENGRAILED 2 (EN2) gene with autism in Chinese Han population. *Am J Med Genet B Neuropsychiatr Genet* 2008;**147B**(4):434-8. PubMed PMID: 17948901.
260. Brune CW, Korvatska E, Allen-Brady K, et al. Heterogeneous association between engrailed-2 and autism in the CPEA network. *Am J Med Genet B Neuropsychiatr Genet* 2008;**147B**(2):187-93. PubMed PMID: 17948868.
261. Benayed R, Gharani N, Rossman I, et al. Support for the homeobox transcription factor gene ENGRAILED 2 as an autism spectrum disorder susceptibility locus. *Am J Hum Genet* 2005;**77**(5):851-68. PubMed PMID: 16252243. Pubmed Central PMCID: 1271392.
262. Gharani N, Benayed R, Mancuso V, et al. Association of the homeobox transcription factor, ENGRAILED 2, 3, with autism spectrum disorder. *Mol Psychiatry* 2004;**9**(5):474-84. PubMed PMID: 15024396.
